1 **Title:** A critical role for MSI1 and MSI2 in photoreceptor morphogenesis

2

3 **Authors:** Jesse Sundar<sup>1</sup>, Fatimah Matakah<sup>1</sup>, Bohye Jeong<sup>1</sup>, Peter Stoilov<sup>1\*</sup>, and Visvanathan  
4 Ramamurthy<sup>1,2,3,\*</sup>

5

6 **Affiliations:** Departments of Biochemistry<sup>1</sup>, Ophthalmology and Visual Sciences<sup>2</sup>, and  
7 Neuroscience<sup>3</sup>; Robert C. Byrd Health Sciences Center, West Virginia University; Morgantown,  
8 West Virginia, USA, 26505;

9

10 **Address for correspondence:**

11 Peter Stoilov, Department of Biochemistry, West Virginia University School of Medicine; 1  
12 Medical Center Dr. Morgantown, WV, USA, 26505; Email: [pstoilov@hsc.wvu.edu](mailto:pstoilov@hsc.wvu.edu); Telephone:  
13 304-293-6334; Fax: 304-293-6846;

14

15 Visvanathan Ramamurthy, Department of Biochemistry, West Virginia University School of  
16 Medicine; 1 Medical Center Dr. Morgantown, WV, USA, 26505; Email:  
17 [ramamurthyv@hsc.wvu.edu](mailto:ramamurthyv@hsc.wvu.edu); Telephone: 304-293-2479; Fax: 304-293-6846;

18

19 **Keywords:** Msi1, Msi2, Musashi, Retina, Photoreceptor, RNA-binding protein, Splicing.

20

21

22

23 **ABSTRACT**

24 We previously proposed a role for the Musashi proteins, MSI1 and MSI2, in  
25 photoreceptor cell development that is mediated by their ability to control alternative splicing.  
26 Photoreceptors with simultaneous deletion of Msi1 and Msi2 did not respond to light, displayed  
27 severely disrupted OS morphology and axonemal defects. At postnatal day 5, we observed an  
28 increase in proliferating retinal progenitor cells in the knockout animals, suggesting delay in  
29 photoreceptor development. The loss of Musashi prevented the use of photoreceptor-specific  
30 exons in transcripts important for OS morphogenesis, ciliogenesis and synaptic transmission.  
31 However, deletion of the photoreceptor-specific exons in *Ttc8*, *Cc2d2a*, *Cep290*, *Cacna2d4*, and  
32 *Slc17a7* did not impair retinal development or visual function. We demonstrate a critical role for  
33 Musashi in the morphogenesis of terminally differentiated photoreceptor neurons. This role is in  
34 stark contrast with the canonical function of the two proteins in maintenance and renewal of stem  
35 cells.

36

37

38

## 39 INTRODUCTION

40 In eukaryotes, alternative splicing of pre-mRNA is a process that increases protein  
41 diversity and controls gene expression. Diversification of proteomes through alternative splicing  
42 is a defining characteristic of metazoans and was expanded dramatically in bilaterians<sup>1</sup>.  
43 Alternative splicing is particularly prevalent in vertebrate neurons and is critical for the  
44 development and function of vertebrate nervous systems<sup>2-7</sup>.

45 We previously showed that photoreceptor neurons exploit a unique splicing program<sup>8</sup>.  
46 Motif enrichment analysis suggested that Musashi-1 (MSI1) and Musashi-2 (MSI2), promote the  
47 use of photoreceptor specific exons<sup>8</sup>. We further showed that MSI1 is critical for utilization of  
48 photoreceptor specific exon in Tetratricopeptide repeat domain protein-8 (Ttc8)<sup>8</sup>. In addition,  
49 Musashi promotes the splicing of several photoreceptor specific exons when over-expressed in  
50 cultured cells<sup>8</sup>. Recently, analysis of a comprehensive gene expression data set that spanned  
51 multiple tissues and cell types from mice and human proved that photoreceptors utilize a unique  
52 set of alternative exons that are primarily regulated by MSI1 and MSI2<sup>9</sup>. Furthermore, the work  
53 by Ling et. al. demonstrated that Msi1 transcript levels are upregulated in the developing rod  
54 photoreceptors and reach exceptionally high levels compared to all other cell types or tissues in  
55 the data set.

56 The MSI1 and MSI2 proteins have two highly conserved RNA binding domains (RBDs)  
57 in the N-terminal region which show close to 90% sequence identity and recognize a similar  
58 UAG motif in RNA<sup>10</sup>. The two RBDs of MSI1 and MSI2 are followed by a less conserved C-  
59 terminal region which shows approximately 70% sequence identity<sup>11</sup>. The high degree of  
60 sequence identity between the MSI1 and MSI2 results in functional redundancy between the two  
61 proteins<sup>12,13</sup>. The canonical function of the Musashi proteins is to control mRNA translation in

62 the cytosol<sup>14,15</sup>, where they can either block or enhance translation of mRNA depending on  
63 cellular context<sup>16-21</sup>.

64 Vertebrate photoreceptors are neurons specialized in detecting and transducing light  
65 stimuli. Photoreceptors are characterized by segmented morphology which compartmentalizes  
66 phototransduction, core cellular functions, and synaptic transmission. The light sensing  
67 machinery is confined to the outer segment, a stack of membranes that is elaborated by cell's  
68 modified primary cilium. The outer segment is dynamic structure that is remade every 7 to 10  
69 days. Consequently, maintenance of the outer segment requires high rate of transport of  
70 membranes and proteins through the connecting cilium<sup>22</sup>.

71 Interestingly, the predicted splicing targets of Musashi in photoreceptors include pre-  
72 mRNAs from ciliary (*Ttc8*, *Cep290*, *Cc2d2a*, *Prom1*) and synaptic-associated genes (*Cacna2d4*,  
73 *Slc17a7*)<sup>23-29</sup>. These genes have been showed to be crucial for photoreceptor development and  
74 function<sup>23-29</sup>. We proposed that production of photoreceptor specific splicing isoforms that is  
75 promoted by Musashi is necessary for the development and maintenance of photoreceptor cells  
76 *in vivo*<sup>8</sup>.

77 To test if Musashi drives photoreceptor development and function, we removed *Msi1* and  
78 *Msi2* in the developing retina and rod photoreceptor cells. We find that Musashi proteins are  
79 essential for photoreceptor function, morphogenesis, and survival but not their specification.  
80 Specifically, the Musashi proteins are crucial for outer segment (OS) and axoneme development.  
81 As expected, disruption of the Musashi genes led to loss of expression of photoreceptor specific  
82 splicing isoforms. Surprisingly, deleting the photoreceptor-specific exons of the, *Ttc8*, *Cc2d2a*,  
83 *Cep290*, *Cacna2d4*, and *Slc17a7* genes does not produce a detectable phenotype suggesting that  
84 the loss of vision in the Musashi mutants is likely independent of the role of the Musashi proteins

85 in controlling alternative splicing.

86

87

## 88 MATERIALS AND METHODS

### 89 Generation of mice and genotyping

90 Mice carrying floxed alleles for *Msi1* and *Msi2* were provided by Dr. Christopher  
91 Lengner from the University of Pennsylvania. *Six3-Cre* transgene or *Nrl-Cre* transgenes were  
92 used to delete the floxed alleles in developing retina or rod photoreceptors. All mouse lines were  
93 devoid of naturally occurring *rd1* and *rd8* alleles<sup>30,31</sup>. Males hemizygous for the *Six3-Cre*  
94 transgene or *Nrl-Cre* transgene and floxed for either *Msi1*, *Msi2*, or both *Msi1* and *Msi2* were  
95 mated with females floxed for either *Msi1*, *Msi2*, or both *Msi1* and *Msi2* to obtain experimental  
96 knockout mice and littermate control. The offspring of breeding pairs were genotyped using PCR  
97 of DNA derived from ear biopsies. The *Msi1* wildtype and floxed alleles were identified using  
98 following primers: (5'-CGG ACT GGG AGA GGT TTC TT-3' and 5'-AGC TCC CCT GAT  
99 TCC TGG T-3')<sup>32</sup>. The *Msi2* wildtype and floxed alleles were identified by using following  
100 primers: (5'-GCT CGG CTG ACA AAG AAA GT-3' and 5'-TCT CCT TGT TGC GCT CAG  
101 TA-3')<sup>32</sup>. The presence of the *Six3 Cre* transgene was determined using following primers: (5'-  
102 CCC AAA TGT TGC TGG ATA GT-3' and 5'-CCC TCT CCT CTC CCT CCT-3'). The  
103 presence of the *Nrl Cre* transgene was determined using following primers: (5'-TTT CAC TGG  
104 CTT CTG AGT CC-3' and 5'-CTT CAG GTT CTG CGG GAA AC-3'). The presence of *Cre*  
105 recombinase was determined using following primers: (5'-CCT GGA AAA TGC TTC TGT  
106 CCG-3' and 5'-CAG GGT GTT ATA AGC AAT CCC-3')<sup>33</sup>.

107 The knockout of the photoreceptor specific exons in *Ttc8*, *Cep 290*, and *Cc2d2a* was  
108 done using CRISPR/Cas9. Two guide RNAs were used for each alternative exon to target  
109 intronic sites upstream and downstream of the alternative exons to cause their deletion. The  
110 guide RNAs were commercially synthesized by Synthego and had the following targeting

111 sequences: Ttc8-1 GUUCCUGGAAAGCGUUAAGA, Ttc8-2  
112 CAGCACAUUUUCCAAUCUUC, Cep290-1 CCCUAAGGGUAGUUAAGCU, Cep290-2  
113 CGUUUGUUCUUCAAAAGGAC, Cc2d2a-1 GCAUGUCACUCAUCUACCAU, and Cc2d2a-2  
114 AGCGUUUAACUGAUGACUGC. The guide RNAs and Cas9 (Thermo Fisher) were assembled  
115 into RNPs and electroporated into zygotes by the WVU transgenics core facility. The founders  
116 were back-crossed to wild type C57 Black 6/J for 5 generations to eliminate off-target mutations.  
117 The deleted exons were genotyped using the following primers: Ttc8-CRISP-F  
118 ctcccatcctagccaatct, Ttc8-CRISP-R tgtgcacaggcaaaataagc, Cep290-CRISP-F  
119 gagcaaacacagcagtcagc, Cep290-CRISP-R tctctgaccgccactact, Cc2d2a-CRISP-F  
120 gctacacacatggctggatg, Cc2d2a-CRISP-R ctctcatgtgacaggcagga.

121 All experiments were conducted with the approval of the Institutional Animal Care and  
122 Use Committee at West Virginia University. All experiments were carried out with adherence to  
123 the principles set forth in the ARVO Statement for the Ethical Use of Animals in Ophthalmic and  
124 Vision Research which advocates the use of the minimum number of animals per study needed  
125 to obtain statistical significance.

## 126 **Electroretinography, Immunoblotting, and Reverse Transcriptase PCR**

127 Electroretinography, immunoblotting, and reverse transcriptase PCR were conducted  
128 using previously described protocol from our laboratory<sup>8,34,35</sup>.

## 129 **Immunofluorescence Microscopy**

130 Immunofluorescence microscopy was carried out using a modified procedure in our  
131 laboratory<sup>34,35</sup>. Briefly, eyes were enucleated, and the cornea and lens were discarded. After  
132 dissection, eyes were fixed by immersion in 4% paraformaldehyde in PBS for one hour. After  
133 washing the eyes in PBS three times for ten minutes each, they were dehydrated by overnight

134 incubation in 30% sucrose in PBS. Eyes were then incubated in a 1:1 solution of OCT:30%  
135 sucrose in PBS for one hour and frozen in OCT (VWR). The frozen tissues were sectioned using  
136 a Leica CM1850 cryostat for collecting serial retinal sections of 16µm thickness. The retinal  
137 cross-sections were then mounted onto Superfrost Plus microscope slides (Fisher Scientific).  
138 Slide sections were then washed and permeabilized with PBS supplemented with 0.1% Triton X-  
139 100 (PBST) and incubated for one hour in a blocking buffer containing 10% goat serum, 0.3%  
140 Triton X-100, and 0.02% sodium azide in PBS. Retinal sections were then incubated with  
141 primary antibody in a dilution buffer containing 5% goat serum, 0.3% Triton X-100, 0.02%  
142 sodium azide, and primary antibody at 1:500 dilution in PBS overnight at 4°C followed by three  
143 5 minute washes using PBST. Sections were then incubated in the same dilution buffer  
144 containing secondary antibody and DAPI at 1:1000 for one hour. Slides were washed with PBST  
145 three times for five minutes each before treating with Prolong Gold Antifade reagent  
146 (ThermoFisher) and securing the coverslip. The images were collected using a Nikon C2  
147 Confocal Microscope.

#### 148 **Retinal histology of the mouse models**

149 Following euthanasia, eyes were enucleated using a C-shaped forceps after marking the  
150 superior pole and incubated in Z-fixative for >48 hours before shipment and tissue processing by  
151 Excalibur Pathology Inc. (Norman, OK)<sup>34,35</sup>. The embedding, serial sectioning, mounting, and  
152 hematoxylin/eosin (H&E) staining were performed by Excalibur Pathology. A Nikon C2  
153 Microscope equipped with Elements software was used to image the slides.

#### 154 **Transmission Electron Microscopy**

155 After euthanasia, a C-shaped forceps was used to enucleate the eye, and the cornea was  
156 discarded<sup>34,35</sup>. Eyes were then incubated in a fixative solution containing 2.5% glutaraldehyde



157 and 2% paraformaldehyde in 100mM sodium cacodylate buffer at pH 7.5 for 45 minutes before  
158 removal of the lens. After lensectomy, eyes were placed back into fixative for 72 hours before  
159 shipment, tissue processing, and imaging at the Robert P. Apkarian Integrated Electron  
160 Microscopy Core at Emory University.

## 161 **Antibodies**

162 The following primary antibodies were used throughout our studies: rat anti-MSI1  
163 (1:1000; Medical and Biological Laboratories, Woburn, MA), rabbit anti-MSI2 (1:2000; Abcam,  
164 Cambridge, MA), mouse anti- $\beta$ -tubulin (1:10,000; Sigma-Aldrich, St. Louis, MO), rabbit anti-  
165 phospho-histone H3 (1:500; Cell Signaling, Danvers, MA), mouse anti-Ki67 (1:500; BD  
166 Biosciences, San Jose, CA), rabbit anti-active Caspase-3 (1:500; Promega, Madison, WI),  
167 rhodamine peanut agglutinin (1:1000; PNA: cone OS sheath marker, Vector laboratories,  
168 Burlingame, CA), rabbit anti-peripherin-2 (1:2000) was a kind gift by Dr. Andrew Goldberg  
169 from Oakland University, rabbit anti-PDE6 $\beta$  (1:2000; ThermoFisher, Waltham, MA), mouse  
170 anti-acetylated  $\alpha$ -tubulin (1:1000; Santa Cruz, Dallas, TX), guinea pig anti-MAK (1:500; Wako,  
171 Richmond, VA), mouse anti-glutamylated tubulin (1:500; AdipoGen Life Sciences, San Diego,  
172 CA), mouse anti-Ttc8 (1:1000; Santa Cruz, Dallas, TX), rabbit anti-Ttc8 Exon 2A (1:1000;  
173 custom made<sup>8</sup>), mouse anti-GAPDH (1:10,000; Fitzgerald, Acton, MA), and 4',6-diamidino-2-  
174 phenylindole (DAPI: nuclear counterstain; 1:1000; ThermoFisher, Waltham, MA).

175

176

## 177 **RESULTS**

### 178 **Validation of the conditional knockout mouse models**

179 We analyzed the expression of Musashi proteins in various tissues from adult mice. Out  
180 of all the tissues we tested, retina showed the highest expression of MSI1 and MSI2 proteins  
181 (Figure 1A), in line with the previously reported high transcript levels for *Msi1* and *Msi2* in rod  
182 photoreceptors<sup>9</sup>. To test the biological significance of Musashi protein expression in the murine  
183 retina, we used *Cre-LoxP* conditional recombination to remove either *Msi1*, *Msi2*, or both the  
184 *Msi1* and *Msi2* genes throughout the entire retina and ventral forebrain using the *Six3 Cre*  
185 transgene (Supplementary Figure 1)<sup>36</sup>. Throughout this work, we refer to *Musashi* floxed mice  
186 which are hemizygous for the *Six3 Cre* transgene as *ret-Msi*<sup>-/-</sup> mice. The conditional  
187 recombination results in the deletion of *Msi1*'s transcription start site, exon 1, and exon 2  
188 (Supplementary Figure 1)<sup>13</sup>. For *Msi2*, the transcription start site and the first four exons are  
189 removed after cre-mediated recombination (Supplementary Figure 1)<sup>13</sup>. The ablation of MSI1  
190 and MSI2 was confirmed by immunoblotting retinal lysates from knockout mice at postnatal day  
191 10 (PN10) (Figure 1B). Immunofluorescence microscopy of retinal cross sections obtained from  
192 the knockout mice also affirmed the absence of MSI1 and MSI2 expression in the retina (Figure  
193 1C). Notably, MSI2 protein levels were moderately but reproducibly upregulated in *Msi1*  
194 knockout retina (Figure 1B, Supplementary Figure 2). We did not observe the inverse,  
195 upregulation of MSI1 protein in *Msi2* knockouts (Supplementary Figure 2). These data show that  
196 MSI1 protein regulates the expression of MSI2 and could indicate existence of a homeostatic  
197 mechanism for regulation overall Musashi protein levels.

### 198 **The Musashi proteins are crucial for photoreceptor function**

199 To determine if the Musashi proteins are required for photoreceptor function, we

200 performed electroretinographic (ERG) recordings of the *Musashi* conditional knockout mice at  
201 PN16 and monitored for changes in retinal function up to PN180. Figure 2A shows the scotopic  
202 and photopic ERG waveforms of the *ret-Msi1*<sup>-/-</sup>, *ret-Msi2*<sup>-/-</sup>, and *ret-Msi1*<sup>-/-</sup>:*Msi2*<sup>-/-</sup> mice at  
203 PN16 immediately after mice open their eyes<sup>37</sup>. When both *Musashi* genes are removed, no  
204 scotopic or photopic retinal function remains as shown by absence of conspicuous “a”-waves and  
205 “b”-waves (Figure 2A). However, significant retinal function remains in the *ret-Msi1*<sup>-/-</sup> and *ret-*  
206 *Msi2*<sup>-/-</sup> single knockout mice. We characterized the retinal function of the *ret-Msi1*<sup>-/-</sup> and *ret-*  
207 *Msi2*<sup>-/-</sup> mice further to see if there was a photoresponse deficit at higher light intensities or as the  
208 mice aged (Figure 2B-E). In *ret-Msi1*<sup>-/-</sup> mice, there was a statistically significant reduction in  
209 photoreceptor “a”-wave amplitudes at almost all light intensities (Figure 2B). This reduction in  
210 the photoreceptor “a”-wave amplitude persisted in *ret-Msi1*<sup>-/-</sup> mice up to PN180 (Figure 2C). On  
211 the other hand, *ret-Msi2*<sup>-/-</sup> mice at PN16 had normal photoreceptor function at all the light  
212 intensities we tested (Figure 2D). The “a”-wave amplitude began to decrease progressively in  
213 *ret-Msi2*<sup>-/-</sup> mice as they aged, and this became significant at PN120 (Figure 2E). Overall, this  
214 data shows that the Musashi proteins essential for photoreceptor function, and the two proteins  
215 are partially redundant.

### 216 **Intrinsic expression of Musashi in photoreceptors is crucial for photoreceptor function**

217 We next sought to determine if the phenotype of the *ret-Msi*<sup>-/-</sup> mice was due to the  
218 absence of Musashi protein expression in photoreceptors or if deletion of Musashi in other retinal  
219 cell types or retinal progenitors were contributing to the loss of vision. To this end, we generated  
220 rod-specific *Musashi* conditional knockouts by crossing *Musashi* floxed mice with mice  
221 hemizygous for the *Nrl Cre* transgene where the *Nrl* promoter activates Cre expression in rod  
222 photoreceptors<sup>38</sup>. Throughout this work, we refer to the *Musashi* floxed mice that are

223 hemizygous for the *Nrl Cre* transgene as *rod-Msi*<sup>-/-</sup> mice. After confirming the loss of Musashi  
224 proteins in rod photoreceptors (Supplementary Figure 3), we used ERG to analyze the retinal  
225 function of the knockout mice after ablation of the *Musashi* genes in rods (Supplementary Figure  
226 4A-E). Supplementary Figure 4A shows the scotopic and photopic ERG waveforms of the *rod-*  
227 *Msi1*<sup>-/-</sup>, *rod-Msi2*<sup>-/-</sup>, and *rod-Msi1*<sup>-/-</sup>:*Msi2*<sup>-/-</sup> mice at PN16. As observed in the *ret-Msi1*<sup>-/-</sup>  
228 :*Msi2*<sup>-/-</sup> mice, no conspicuous rod function was observed in the *rod-Msi1*<sup>-/-</sup>:*Msi2*<sup>-/-</sup> mice at  
229 PN16 which is demonstrated by absence of conspicuous “a”-wave under scotopic testing  
230 conditions (Supplementary Figure 4A). Again, we examined the *rod-Msi1*<sup>-/-</sup> and *rod-Msi2*<sup>-/-</sup>  
231 single knockout mice further to see if the photoresponse phenotype was comparable to that  
232 obtained from the *ret-Msi1*<sup>-/-</sup> and *ret-Msi2*<sup>-/-</sup> mice. In *rod-Msi1*<sup>-/-</sup> mice at PN16, there was a  
233 reduction in photoreceptor “a”-wave amplitudes at multiple light intensities (Supplementary  
234 Figure 4B). This reduction in “a”-wave amplitude persisted as these mice aged up to PN180  
235 (Supplementary Figure 4C). Contrarily, PN16 *rod-Msi2*<sup>-/-</sup> mice had no changes in photoreceptor  
236 function at all the light intensities examined (Supplementary Figure 4D). As observed in the *ret-*  
237 *Msi2*<sup>-/-</sup> mice, the “a”-wave amplitude began to decrease progressively as these mice aged, and  
238 this decrease became statistically significant at PN90 (Supplementary Figure 4E). The similar  
239 phenotypes of the *ret-Msi* and *rod-Msi* knockout mice shows that the intrinsic expression of  
240 Musashi proteins in photoreceptors is crucial for their function and that deletion of Musashi  
241 proteins in other cell types likely does not contribute significantly to the phenotype observed in  
242 the *ret-Msi*<sup>-/-</sup> mice. Therefore, throughout the rest of our studies, we focus on the *ret-Msi1*<sup>-/-</sup>  
243 :*Msi2*<sup>-/-</sup> mouse model for our experiments since there is a compensation in function occurring  
244 between MSI1 and MSI2 in the single knockout mice and to avoid confounding results that  
245 might be obtained when *Msi1* and *Msi2* are deleted only in rod but not cone photoreceptors.

## 246 **Retinal cell death occurs in the absence of the Musashi proteins**

247           We next wanted to examine the mechanism behind the photoreceptor dysfunction seen in  
248 the *ret-Msi1<sup>-/-</sup>:Msi2<sup>-/-</sup>* mouse model. One of the common causes of a reduced ERG is  
249 photoreceptor cell death. Therefore, we performed histological analysis of the *ret-Msi1<sup>-/-</sup>:Msi2<sup>-/-</sup>*  
250 *-/-* mice at PN5, PN10, PN16, and PN180 (Figure 3A-D). In *ret-Msi1<sup>-/-</sup>:Msi2<sup>-/-</sup>* mice at PN5,  
251 even before the neural retina has differentiated completely, there is a reduction in the neuroblast  
252 layer (NBL) thickness which was quantified across the superior-inferior axis (Figure 3A, left and  
253 right panels). There is also a more disordered arrangement of NBL nuclei in *ret-Msi1<sup>-/-</sup>:Msi2<sup>-/-</sup>*  
254 mice with cells more tightly packed together compared to its littermate control (Figure 3A, left  
255 panel). At PN10, the outer nuclear layer (ONL), inner nuclear layer (INL), and ganglion cell  
256 layer (GCL) of the retina all form in *ret-Msi1<sup>-/-</sup>:Msi2<sup>-/-</sup>* mice but there is a reduction in the  
257 number of layers of photoreceptor nuclei (Figure 3B, left and right panels). At PN16, the number  
258 of layers of ONL nuclei continue to decrease suggesting that photoreceptor cell death is  
259 occurring (Figure 3C, left and middle panels). However, at this age, there are no statistically  
260 significant changes in the number of layers of INL nuclei (Figure 3C, left and right panels). By 6  
261 months of age, the retina of *ret-Msi1<sup>-/-</sup>:Msi2<sup>-/-</sup>* mice was severely degenerated with a complete  
262 loss of ONL nuclei in addition to a significant reduction in the number of layers of INL nuclei  
263 (Figure 3D, left, middle, and right panels).

## 264 **Changes in proliferation during retinal development in the absence of MSI1 and MSI2**

265           After observing a significant reduction in NBL nuclei in *ret-Msi1<sup>-/-</sup>:Msi2<sup>-/-</sup>* mice even  
266 before their retinas had fully differentiated, we wanted to investigate if this phenotype is related  
267 to the proliferation or premature death of retinal progenitor cells (RPCs). We collected retinal  
268 cross sections of *ret-Msi1<sup>-/-</sup>:Msi2<sup>-/-</sup>* mice at PN5 and probed with antibodies against phospho-

269 histone H3 (PHH3) and Ki67, which are two commonly used markers of proliferation<sup>39-41</sup>. We  
270 also examined apoptosis of retinal cells in *ret-Msi1<sup>-/-</sup>:Msi2<sup>-/-</sup>* mice by staining with an antibody  
271 against the apoptotic marker anti-active Caspase-3 (CASP3)<sup>40,42</sup>. In *ret-Msi1<sup>-/-</sup>:Msi2<sup>-/-</sup>* mice, we  
272 witnessed a substantial increase of both PHH3<sup>+</sup> and Ki67<sup>+</sup> cells within the central retina  
273 whereas the littermate control had very few PHH3<sup>+</sup> and Ki67<sup>+</sup> cells within the central retina  
274 (Figure 4A and B). We also noticed a trend toward increase of PHH3<sup>+</sup> and Ki67<sup>+</sup> cell in the  
275 peripheral retina of *ret-Msi1<sup>-/-</sup>:Msi2<sup>-/-</sup>* mice (Figure 4A and B). No significant changes in  
276 proliferation marker staining were witnessed when comparing the superior and inferior retina of  
277 *ret-Msi1<sup>-/-</sup>:Msi2<sup>-/-</sup>* mice. CASP3 staining of retinal cross sections from *ret-Msi1<sup>-/-</sup>:Msi2<sup>-/-</sup>* mice  
278 showed no significant differences in the number of CASP3<sup>+</sup> cells in either the central or  
279 peripheral retina (Figure 4C). Our data points to altered proliferation and not increased apoptosis  
280 at early stages of retinal development as the cause for the reduced number of NBL nuclei at PN5  
281 in the Musashi knockout mice.

## 282 **The Musashi proteins are required for OS development**

283 Photoreceptor cells are present in the *ret-Msi1<sup>-/-</sup>:Msi2<sup>-/-</sup>* as indicated by the well-defined  
284 ONL (Figure 3C). We therefore examined the structure of the OS in *ret-Msi1<sup>-/-</sup>:Msi2<sup>-/-</sup>* mice at  
285 PN16 by immunofluorescence microscopy using three different OS markers, anti-Peripherin-2  
286 (PRPH2: OS marker), anti-Phosphodiesterase-6 $\beta$  (PDE6 $\beta$ : rod OS marker), and peanut  
287 agglutinin (PNA: cone OS marker). After staining retinal cross sections from *ret-Msi1<sup>-/-</sup>:Msi2<sup>-/-</sup>*  
288 mice with PRPH2 and PNA, we observed a severe shortening of the photoreceptor outer segment  
289 (Figure 5A). This result was not limited to PRPH2, as staining with the rod OS marker PDE6 $\beta$   
290 demonstrated the same phenotype (Figure 5B). The outer segment of cone photoreceptors also  
291 appears to be severely shortened as shown by the abnormal PNA staining (Figure 5A-B). This

292 defect is likely independent of degeneration since a similar change was observed at PN10 before  
293 significant degeneration (Supplementary Figure 6). Lastly, no mislocalization of PDE6 $\beta$  or  
294 PRPH2 is found in the ONL or inner segment of *ret-Msi1*<sup>-/-</sup>:*Msi2*<sup>-/-</sup> mice suggesting that while  
295 the Musashi proteins are required for outer segment formation they are not regulating trafficking  
296 or localization of OS-resident proteins (Figure 5B).

### 297 **The Musashi proteins are crucial for photoreceptor outer segment and axoneme** 298 **development**

299 Using transmission electron microscopy, we imaged ultrathin retinal sections from *ret-*  
300 *Msi1*<sup>-/-</sup>:*Msi2*<sup>-/-</sup> mice at PN10 when the OS begins to elaborate (Figure 6). When examining the  
301 OS/IS boundary in *ret-Msi1*<sup>-/-</sup>:*Msi2*<sup>-/-</sup> mice by electron microscopy, we observed very little, if  
302 any, conspicuous OS (Figure 6A). Instead, the IS of the *ret-Msi1*<sup>-/-</sup>:*Msi2*<sup>-/-</sup> mice appears to  
303 come in direct contact with the RPE (Figure 6A-B). At higher magnification, the photoreceptors  
304 of *ret-Msi1*<sup>-/-</sup>:*Msi2*<sup>-/-</sup> mice displayed either no OS or aberrant and undersized OS (Figure 6B  
305 left, middle, and right panels). The basal body and connecting cilium (CC) appear to be normal  
306 in structure and size (Figure 6B, middle panel).

307 To further examine the structure of the connecting cilium and the axoneme, we stained  
308 retinal cross sections from *ret-Msi1*<sup>-/-</sup>:*Msi2*<sup>-/-</sup> mice at PN10 using antibodies directed against the  
309 connecting cilium (glutamylated and acetylated  $\alpha$ -tubulin) and axoneme (MAK) markers<sup>40,43-45</sup>.  
310 Probing with glutamylated and acetylated  $\alpha$ -tubulin antibodies showed that there were no  
311 changes in the length of the CC (Figure 7A, C-D). Contrarily, staining with the anti-MAK  
312 antibody showed a substantial reduction in the length of the axoneme accompanied with punctate  
313 staining suggesting a severe structural defect of the axoneme (Figure 7A-B).

### 314 **The Musashi proteins promote splicing of photoreceptor specific exons**

315 Our previous studies suggested that the Musashi proteins are regulating alternative  
316 splicing of their target pre-mRNAs in vertebrate photoreceptors<sup>8</sup>. To test if the Musashi proteins  
317 are responsible for the inclusion of photoreceptor specific exon , we analyzed the splicing in *ret-*  
318 *Msi1*<sup>-/-</sup>:*Msi2*<sup>-/-</sup> mice of pre-mRNAs from cilia-and OS-related genes that we previously showed  
319 to express photoreceptor specific isoforms (Figure 8). We witnessed a drastic reduction in  
320 alternative exon inclusion in *ret-Msi1*<sup>-/-</sup>:*Msi2*<sup>-/-</sup> mice for all tested transcripts (Figure 8B). We  
321 analyzed isoform expression at the protein level for Ttc8 using two different antibodies, a pan-  
322 antibody that recognizes all Ttc8 protein isoforms (Pan-Ttc8) and the other that recognizes the  
323 photoreceptor-specific isoform of Ttc8 by binding the epitope encoded by Exon 2A (the  
324 photoreceptor-specific exon of *Ttc8*) (Figure 8A, bottom panel). After probing retinal lysates  
325 from the *ret-Msi1*<sup>-/-</sup>:*Msi2*<sup>-/-</sup> mice with the pan-Ttc8 antibody, we observed faster migration of  
326 the Ttc8 protein compared to the littermate control suggesting that the Exon 2A was not included  
327 (Figure 8C). Concordantly, when probing for the photoreceptor-specific isoform of Ttc8 using  
328 the Ttc8 Exon 2A antibody, we saw an absence of this isoform in *ret-Msi1*<sup>-/-</sup>:*Msi2*<sup>-/-</sup> mice  
329 (Figure 8C). Taken together, these results demonstrate that the Musashi proteins are required for  
330 the inclusion of photoreceptor specific alternative exons.

### 331 **Alternative exons included in photoreceptor mRNAs are not required for photoreceptor** 332 **cell development**

333 To examine the biological significance of the photoreceptor-specific splicing program  
334 that is regulated by the Musashi proteins, we used CRISPR-Cas9 to delete the photoreceptor-  
335 specific exons from the *Ttc8*, *Cc2d2a*, *Cep290*, *Cacna2d4*, and *Slc17a7* genes in *C57BL6/J* mice.  
336 These exons were chosen because: (i) they are in genes critical for vision; (ii) the exons are used  
337 specifically in photoreceptors where nearly all of the transcripts include the exon; (iii) the exons



338 with exception of the *Slc17a7* exon are conserved in vertebrates. After validating the exon  
339 knockout mice (Figure 9A), we collected ERG traces from the exon knockout mice to determine  
340 if these exons were necessary for the function of rod and cone photoreceptor cells. Figure 9B  
341 shows ERG traces from the *Ttc8* exon knockout, *Cep290* exon knockout, *Cc2d2a* exon knockout,  
342 *Cacna2d4* exon knockout, and *Slc17a7* exon knockout compared to wildtype (far left). No  
343 significant changes in retinal function were observed in any of exon knockout mice compared to  
344 control by five months of age (Figure 9B) suggesting that the inclusion of these photoreceptor-  
345 specific exon inclusion is not critical for rod and cone function.  
346

347 **DISCUSSION**

348 **MSI1 and MSI2 are required for photoreceptor morphogenesis but not specification**

349 Our data shows the requirement for MSI1 and MSI2 in photoreceptor cells. Double  
350 knockout of *Msi1* and *Msi2* in retinal progenitors results in complete loss of vision. Two lines of  
351 evidence demonstrate that this loss of vision is due to a defect in photoreceptor morphogenesis,  
352 rather than developmental defects due to impairment of the retinal progenitor cells. First, the  
353 specification of retinal progenitors to photoreceptor cells was not affected by loss of Musashi.  
354 The retina of the knockout mice had clearly defined outer nuclear layer. The rod photoreceptor  
355 nuclei retained their characteristic morphology, and the photoreceptor cells expressed cell type  
356 specific transcripts such as peripherin and PDE6 $\beta$ . Importantly, knockout of *Msi1* and *Msi2* in  
357 rod photoreceptors driven by *Nrl-Cre* caused loss of scotopic photoresponse. Thus, the vision  
358 phenotype is not due to impairment of the early stages of retinal development and is caused by a  
359 defect specific to photoreceptor cells.

360 Morphological examination by electron microscopy and immunofluorescence showed  
361 that the outer segment of the photoreceptors lacking Musashi is either missing or is stunted and  
362 disorganized. The absence of outer segment is accompanied by a shortened axoneme. In  
363 contrast, the connecting cilium has normal length and did not have obvious defects. Trafficking  
364 of PDE6 and peripherin through the connecting cilium also appears to be normal and the two  
365 proteins localize to the stunted outer segment wherever one is present. Taken together our  
366 findings demonstrates a requirement for Musashi in the morphogenesis and function of the  
367 photoreceptor outer segment that appears not to affect transport along the connecting cilium.

368

369 **Normal photoreceptor function in photoreceptor-specific exon knockout mice**

370 RT-PCR analysis of alternative splicing in the retina of *Msi1* and *Msi2* knockout mice  
371 showed that inclusion of photoreceptor specific exons in the mature transcripts is dependent on  
372 the Musashi proteins. Even though MSI1 and MSI2 regulate the splicing of the *Ttc8*, *Cc2d2a*,  
373 *Cep290*, *Cacna2d4*, and *Slc17a7* pre-mRNAs, knockouts of the photoreceptor specific-exons in  
374 these genes revealed that these exons are not crucial for photoreceptor function. The retina of the  
375 exon knockout animals developed normally, and no adverse phenotype was observed up to 5  
376 months after birth. Thus, our data does not support a mechanism by which alternative splicing  
377 mediates the phenotype of the Musashi knockouts in photoreceptor cells. This is a surprising  
378 result considering that four out of the exons are conserved and the genes that host them are  
379 critical for vision. Based on the currently available data we cannot completely rule out role for  
380 splicing in shaping the phenotype of the Musashi knockouts. Nevertheless, our results point that  
381 other mechanism need to be explored, particularly in the light of the documented role for  
382 Musashi in control mRNA translation.

### 383 **Cell proliferation and survival in the Musashi knockout retina**

384 Morphological examination showed reduced cell number in the neuroblastoid layer at  
385 postnatal day 5 in the knockout animals. In the mature retina the outer nuclear layer did not reach  
386 the size of the corresponding layers in the wild type animals and progressively degenerated with  
387 age. The MSI1 protein was previously reported to be required for photoreceptor survival, but no  
388 loss of inner neurons was reported, likely due to the presence of the paralogous MSI2<sup>46</sup>. The  
389 reduction of the inner nuclear layer that we observe demonstrate that the Musashi proteins are  
390 required for the survival of inner retinal neurons in addition to photoreceptors. Interestingly, the  
391 reduction of the neuroblastic layer in the Musashi knockout retina at postnatal day 5 was  
392 accompanied by increase in the number of proliferating cells that stained positive for PHH3 and

393 Ki67. Caspase 3 staining did not show differences in the number of apoptotic cells between the  
394 wild type and the knockout retina at that stage. These apparently contradictory observations can  
395 be explained with the role of the Musashi proteins in supporting stem cell renewal and  
396 proliferation through activation of the Notch pathway<sup>16,47-50</sup>. We propose that loss of Musashi in  
397 the developing retina reduces the numbers and proliferation rates of the neuronal precursors  
398 leading to delayed development of the neuroblastoid layer.

399

#### 400 **Functional redundancy within the Musashi protein family**

401 In vertebrates, the Musashi protein family consists of two paralogues, MSI1 and MSI2,  
402 which have high degree of sequence identity, and have arisen from a gene duplication event<sup>51,52</sup>.  
403 The RNA binding domains of MSI1 and MSI2 have approximately 90% sequence identity and  
404 recognize the same UAG sequence motif *in vitro* and *in vivo*<sup>53-56</sup>. The high degree of similarity  
405 suggest that the two proteins are likely to be functionally redundant when co-expressed in the  
406 same cells. Indeed, we observed only minor reductions in visual function after the loss of either  
407 MSI1 or MSI2 alone whereas the combined loss of MSI1 and MSI2 resulted in a complete loss  
408 of visual function (Figure 2). Similarly, inclusion of photoreceptor specific exons is promoted  
409 by both proteins, and the double knockout produces stronger effect on splicing than the  
410 knockouts of either *Msi1* or *Msi2*. The functional redundancy in photoreceptor cells that we  
411 observe is in agreement with previous reports of redundancy between MSI1 and MSI2 in other  
412 cell types<sup>12,13</sup>.

413 The redundancy between the two Musashi proteins in the retina appear to be partial. Loss  
414 of MSI1 produce more severe phenotype than loss of MSI2. Specifically, we observe an early  
415 visual defect in the *Msi1* knockout mice, which is absent in the *Msi2* knockouts. Loss of MSI1

416 also produced a stronger effect on splicing compared to MSI2. This partial redundancy may  
417 reflect intrinsic functional differences between the two proteins, or simply difference in their  
418 expression levels in photoreceptor cells. Interestingly, we noticed moderate but reproducible  
419 increased in the MSI2 protein levels after knocking out *Msi1* (Supplementary Figure 2). Such  
420 mutual regulation can contribute to the redundancy between the two proteins and be a part of a  
421 homeostatic mechanism that maintains the overall Musashi protein levels.

422 Our work highlights roles for MSI1 and MSI2 in retinal development, retinal cell survival  
423 and photoreceptor morphogenesis. An interesting aspect of the function of the Musashi proteins  
424 in retina our their apparently mutually exclusive roles at different stages of development. At  
425 early stages of development MSI1 and MSI2 support the renewal and proliferation of retinal  
426 precursor cells. At late stages of retinal development and in the adult retina MSI1 and MSI2 are  
427 required for morphogenesis of the differentiated photoreceptor cells and survival of mature  
428 neurons. These roles are likely executed through translational control of Musashi targets, as  
429 knockouts of alternative exons regulated by the Musashi proteins did not recapitulate any of the  
430 aspects of the phenotype of the Musashi knockout mice. Future studies will be aimed at  
431 determining the mechanism(s) by which the absence of Musashi causes a complete loss of vision  
432 in mice.

433

434

435

436 **FUNDING**

437 This work was supported by the National Institutes of Health [grant numbers RO1  
438 EY028035, R01 EY025536, and R21 EY027707]; the West Virginia Lions Club Foundation; and  
439 International Lions Club Foundation.

440

441 **ACKNOWLEDGEMENTS**

442 The authors thank Maxim Sokolov, John Hollander, Ronald Gross for their feedback on  
443 the work. We also thank Dr. Christopher Lengner for the generous donation of the *Msi1fl/fl*  
444 *Msi2fl/fl* mice and Dr. Andrew Goldberg for PRPH2 antibody.

445

446 **AUTHOR CONTRIBUTIONS**

447 P.S. and V.R. jointly conceived and supervised this study, and edited the manuscript. J.S.  
448 designed and performed experiments, and wrote the manuscript. F.M. and B.J. designed and  
449 performed experiments.

450

451 **CONFLICTS OF INTEREST**

452 The authors declare no conflicts of interest.

453

454

455

456 **REFERENCES**

- 457 1. Grau-Bové, X., Ruiz-Trillo, I. & Irimia, M. Origin of exon skipping-rich transcriptomes in animals driven  
458 by evolution of gene architecture. *Genome Biol.* **19**, 135 (2018).
- 459 2. Li, Y. I., Sanchez-Pulido, L., Haerty, W. & Ponting, C. P. RBFOX and PTBP1 proteins regulate the  
460 alternative splicing of micro-exons in human brain transcripts. *Genome Res.* gr.181990.114 (2014)  
461 doi:10.1101/gr.181990.114.
- 462 3. Irimia, M. *et al.* A Highly Conserved Program of Neuronal Microexons Is Misregulated in Autistic  
463 Brains. *Cell* **159**, 1511–1523 (2014).
- 464 4. Jensen, K. B. *et al.* Nova-1 Regulates Neuron-Specific Alternative Splicing and Is Essential for Neuronal  
465 Viability. *Neuron* **25**, 359–371 (2000).
- 466 5. Gehman, L. T. *et al.* The splicing regulator Rbfox1 (A2BP1) controls neuronal excitation in the  
467 mammalian brain. *Nat Genet* **43**, 706–711 (2011).
- 468 6. Ule, J. *et al.* Nova regulates brain-specific splicing to shape the synapse. *Nat. Genet.* **37**, 844–852  
469 (2005).
- 470 7. Vuong, C. K. *et al.* Rbfox1 Regulates Synaptic Transmission Through the Inhibitory Neuron Specific  
471 vSNARE Vamp1. *Neuron* **98**, 127-141.e7 (2018).
- 472 8. Murphy, D., Cieply, B., Carstens, R., Ramamurthy, V. & Stoilov, P. The Musashi 1 Controls the Splicing  
473 of Photoreceptor-Specific Exons in the Vertebrate Retina. *PLOS Genet.* **12**, e1006256 (2016).
- 474 9. Ling, J. P. *et al.* ASCOT identifies key regulators of neuronal subtype-specific splicing. *Nat. Commun.*  
475 **11**, 1–12 (2020).
- 476 10. Ohyama, T. *et al.* Structure of Musashi1 in a complex with target RNA: the role of aromatic  
477 stacking interactions. *Nucleic Acids Res.* **40**, 3218–3231 (2012).

- 478 11. Sakakibara, S., Nakamura, Y., Satoh, H. & Okano, H. RNA-Binding Protein Musashi2:  
479 Developmentally Regulated Expression in Neural Precursor Cells and Subpopulations of Neurons in  
480 Mammalian CNS. *J. Neurosci.* **21**, 8091–8107 (2001).
- 481 12. Sakakibara, S. *et al.* RNA-binding protein Musashi family: Roles for CNS stem cells and a  
482 subpopulation of ependymal cells revealed by targeted disruption and antisense ablation. *Proc. Natl.*  
483 *Acad. Sci.* **99**, 15194–15199 (2002).
- 484 13. Li, N. *et al.* The Msi Family of RNA-Binding Proteins Function Redundantly as Intestinal  
485 Oncoproteins. *Cell Rep.* **13**, 2440–2455 (2015).
- 486 14. Kudinov, A. E., Karanicolas, J., Golemis, E. A. & Bumber, Y. Musashi RNA-Binding Proteins as  
487 Cancer Drivers and Novel Therapeutic Targets. *Clin. Cancer Res.* **23**, 2143–2153 (2017).
- 488 15. Fox, R. G., Park, F. D., Koechlein, C. S., Kritzik, M. & Reya, T. Musashi Signaling in Stem Cells and  
489 Cancer. *Annu. Rev. Cell Dev. Biol.* **31**, 249–267 (2015).
- 490 16. Imai, T. *et al.* The Neural RNA-Binding Protein Musashi1 Translationally Regulates Mammalian  
491 numb Gene Expression by Interacting with Its mRNA. *Mol. Cell. Biol.* **21**, 3888–3900 (2001).
- 492 17. Battelli, C., Nikopoulos, G. N., Mitchell, J. G. & Verdi, J. M. The RNA-binding protein Musashi-1  
493 regulates neural development through the translational repression of p21WAF-1. *Mol. Cell. Neurosci.*  
494 **31**, 85–96 (2006).
- 495 18. Ma, X. *et al.* Msi2 Maintains Quiescent State of Hair Follicle Stem Cells by Directly Repressing the  
496 Hh Signaling Pathway. *J. Invest. Dermatol.* **137**, 1015–1024 (2017).
- 497 19. Cragle, C. & MacNicol, A. M. Musashi Protein-directed Translational Activation of Target mRNAs  
498 Is Mediated by the Poly(A) Polymerase, Germ Line Development Defective-2. *J. Biol. Chem.* **289**,  
499 14239–14251 (2014).
- 500 20. Rutledge, C. E. *et al.* Efficient Translation of Dnmt1 Requires Cytoplasmic Polyadenylation and  
501 Musashi Binding Elements. *PLOS ONE* **9**, e88385 (2014).



- 502 21. MacNicol, M. C. *et al.* Evasion of regulatory phosphorylation by an alternatively spliced isoform  
503 of Musashi2. *Sci. Rep.* **7**, 1–17 (2017).
- 504 22. Pearing, J. N., Salinas, R. Y., Baker, S. A. & Arshavsky, V. Y. Protein sorting, targeting and  
505 trafficking in photoreceptor cells. *Prog. Retin. Eye Res.* **36**, 24–51 (2013).
- 506 23. Riazuddin, S. A. *et al.* A Splice-Site Mutation in a Retina-Specific Exon of BBS8 Causes  
507 Nonsyndromic Retinitis Pigmentosa. *Am. J. Hum. Genet.* **86**, 805–812 (2010).
- 508 24. Murphy, D., Singh, R., Kolandaivelu, S., Ramamurthy, V. & Stoilov, P. Alternative Splicing Shapes  
509 the Phenotype of a Mutation in BBS8 To Cause Nonsyndromic Retinitis Pigmentosa. *Mol. Cell. Biol.*  
510 **35**, 1860–1870 (2015).
- 511 25. Rachel, R. A., Li, T. & Swaroop, A. Photoreceptor sensory cilia and ciliopathies: focus on CEP290,  
512 RPGR and their interacting proteins. *Cilia* **1**, 22 (2012).
- 513 26. Veleri, S. *et al.* Ciliopathy-associated gene Cc2d2a promotes assembly of subdistal appendages  
514 on the mother centriole during cilia biogenesis. *Nat. Commun.* **5**, 1–12 (2014).
- 515 27. Zacchigna, S. *et al.* Loss of the Cholesterol-Binding Protein Prominin-1/CD133 Causes Disk  
516 Dymorphogenesis and Photoreceptor Degeneration. *J. Neurosci.* **29**, 2297–2308 (2009).
- 517 28. Ba-Abbad, R. *et al.* Mutations in CACNA2D4 Cause Distinctive Retinal Dysfunction in Humans.  
518 *Ophthalmology* **123**, 668-671.e2 (2016).
- 519 29. Johnson, J. *et al.* Vesicular Glutamate Transporter 1 Is Required for Photoreceptor Synaptic  
520 Signaling But Not For Intrinsic Visual Functions. *J. Neurosci.* **27**, 7245–7255 (2007).
- 521 30. A simple polymerase chain reaction assay for genotyping the retinal degeneration mutation  
522 (Pdebrd1) in FVB/N-derived transgenic mice. *Lab. Anim.* **35**, 153–156 (2001).
- 523 31. Pak, J. S., Lee, E.-J. & Craft, C. M. The retinal phenotype of Grk1<sup>-/-</sup> is compromised by a Crb1rd8  
524 mutation. *Mol. Vis.* **21**, 1281–1294 (2015).

- 525 32. Yousefi, M. *et al.* Msi RNA-binding proteins control reserve intestinal stem cell  
526 quiescenceControl of intestinal stem cell quiescence by Msi. *J. Cell Biol.* **215**, 401–413 (2016).
- 527 33. Hirrlinger, P. G., Scheller, A., Braun, C., Hirrlinger, J. & Kirchhoff, F. Temporal control of gene  
528 recombination in astrocytes by transgenic expression of the tamoxifen-inducible DNA recombinase  
529 variant CreERT2. *Glia* **54**, 11–20 (2006).
- 530 34. Wright, Z. C. *et al.* ARL3 regulates trafficking of prenylated phototransduction proteins to the  
531 rod outer segment. *Hum. Mol. Genet.* **25**, 2031–2044 (2016).
- 532 35. Wright, Z. C. *et al.* ADP-Ribosylation Factor-Like 2 (ARL2) regulates cilia stability and  
533 development of outer segments in rod photoreceptor neurons. *Sci. Rep.* **8**, 1–12 (2018).
- 534 36. Furuta, Y., Lagutin, O., Hogan, B. L. M. & Oliver, G. C. Retina- and ventral forebrain-specific Cre  
535 recombinase activity in transgenic mice. *genesis* **26**, 130–132 (2000).
- 536 37. Guan, W. *et al.* Eye opening differentially modulates inhibitory synaptic transmission in the  
537 developing visual cortex. *eLife* **6**, e32337 (2017).
- 538 38. Brightman, D. S., Razafsky, D., Potter, C., Hodzic, D. & Chen, S. Nrl-Cre transgenic mouse  
539 mediates loxP recombination in developing rod photoreceptors. *Genes. N. Y. N 2000* **54**, 129–135  
540 (2016).
- 541 39. Komitova Mila, Mattsson Bengt, Johansson Barbro B. & Eriksson Peter S. Enriched Environment  
542 Increases Neural Stem/Progenitor Cell Proliferation and Neurogenesis in the Subventricular Zone of  
543 Stroke-Lesioned Adult Rats. *Stroke* **36**, 1278–1282 (2005).
- 544 40. Dilan, T. L. *et al.* ARL13B, a Joubert Syndrome-Associated Protein, Is Critical for Retinogenesis  
545 and Elaboration of Mouse Photoreceptor Outer Segments. *J. Neurosci.* **39**, 1347–1364 (2019).
- 546 41. Perou, C. M. *et al.* Distinctive gene expression patterns in human mammary epithelial cells and  
547 breast cancers. *Proc. Natl. Acad. Sci.* **96**, 9212–9217 (1999).

- 548 42. Abu-Qare, A. W. & Abou-Donia, M. B. Biomarkers of apoptosis: release of cytochrome c,  
549 activation of caspase-3, induction of 8-hydroxy-2'-deoxyguanosine, increased 3-nitrotyrosine, and  
550 alteration of p53 gene. *J. Toxicol. Environ. Health B Crit. Rev.* **4**, 313–332 (2001).
- 551 43. Arikawa, K. & Williams, D. S. Acetylated alpha-tubulin in the connecting cilium of developing rat  
552 photoreceptors. *Invest. Ophthalmol. Vis. Sci.* **34**, 2145–2149 (1993).
- 553 44. Grau, M. B. *et al.* Alterations in the balance of tubulin glycylation and glutamylation in  
554 photoreceptors leads to retinal degeneration. *J. Cell Sci.* **130**, 938–949 (2017).
- 555 45. Omori, Y. *et al.* Negative regulation of ciliary length by ciliary male germ cell-associated kinase  
556 (Mak) is required for retinal photoreceptor survival. *Proc. Natl. Acad. Sci.* **107**, 22671–22676 (2010).
- 557 46. Susaki, K. *et al.* Musashi-1, an RNA-binding protein, is indispensable for survival of  
558 photoreceptors. *Exp. Eye Res.* **88**, 347–355 (2009).
- 559 47. Okano, H. *et al.* Function of RNA-binding protein Musashi-1 in stem cells. *Exp. Cell Res.* **306**,  
560 349–356 (2005).
- 561 48. Wuebben, E. L., Mallanna, S. K., Cox, J. L. & Rizzino, A. Musashi2 Is Required for the Self-Renewal  
562 and Pluripotency of Embryonic Stem Cells. *PLOS ONE* **7**, e34827 (2012).
- 563 49. de Andrés-Aguayo, L. *et al.* Musashi 2 is a regulator of the HSC compartment identified by a  
564 retroviral insertion screen and knockout mice. *Blood* **118**, 554–564 (2011).
- 565 50. Siddall, N. A., McLaughlin, E. A., Marriner, N. L. & Hime, G. R. The RNA-binding protein Musashi  
566 is required intrinsically to maintain stem cell identity. *Proc. Natl. Acad. Sci.* **103**, 8402–8407 (2006).
- 567 51. Ohyama, T. *et al.* Structure of Musashi1 in a complex with target RNA: the role of aromatic  
568 stacking interactions. *Nucleic Acids Res.* **40**, 3218–3231 (2012).
- 569 52. Sutherland, J. M., Siddall, N. A., Hime, G. R. & McLaughlin, E. A. RNA binding proteins in  
570 spermatogenesis: an in depth focus on the Musashi family. *Asian J. Androl.* **17**, 529–536 (2015).

- 571 53. Uren, P. J. *et al.* RNA-Binding Protein Musashi1 Is a Central Regulator of Adhesion Pathways in  
572 Glioblastoma. *Mol. Cell. Biol.* **35**, 2965–2978 (2015).
- 573 54. Bennett, C. G. *et al.* Genome-wide analysis of Musashi-2 targets reveals novel functions in  
574 governing epithelial cell migration. *Nucleic Acids Res.* **44**, 3788–3800 (2016).
- 575 55. Rentas, S. *et al.* Musashi-2 attenuates AHR signalling to expand human haematopoietic stem  
576 cells. *Nature* **532**, 508–511 (2016).
- 577 56. Lan, L. *et al.* Human oncoprotein Musashi-2 N-terminal RNA recognition motif backbone  
578 assignment and identification of RNA-binding pocket. *Oncotarget* **8**, 106587–106597 (2017).
- 579
- 580
- 581

582 **FIGURE 1**

583

584

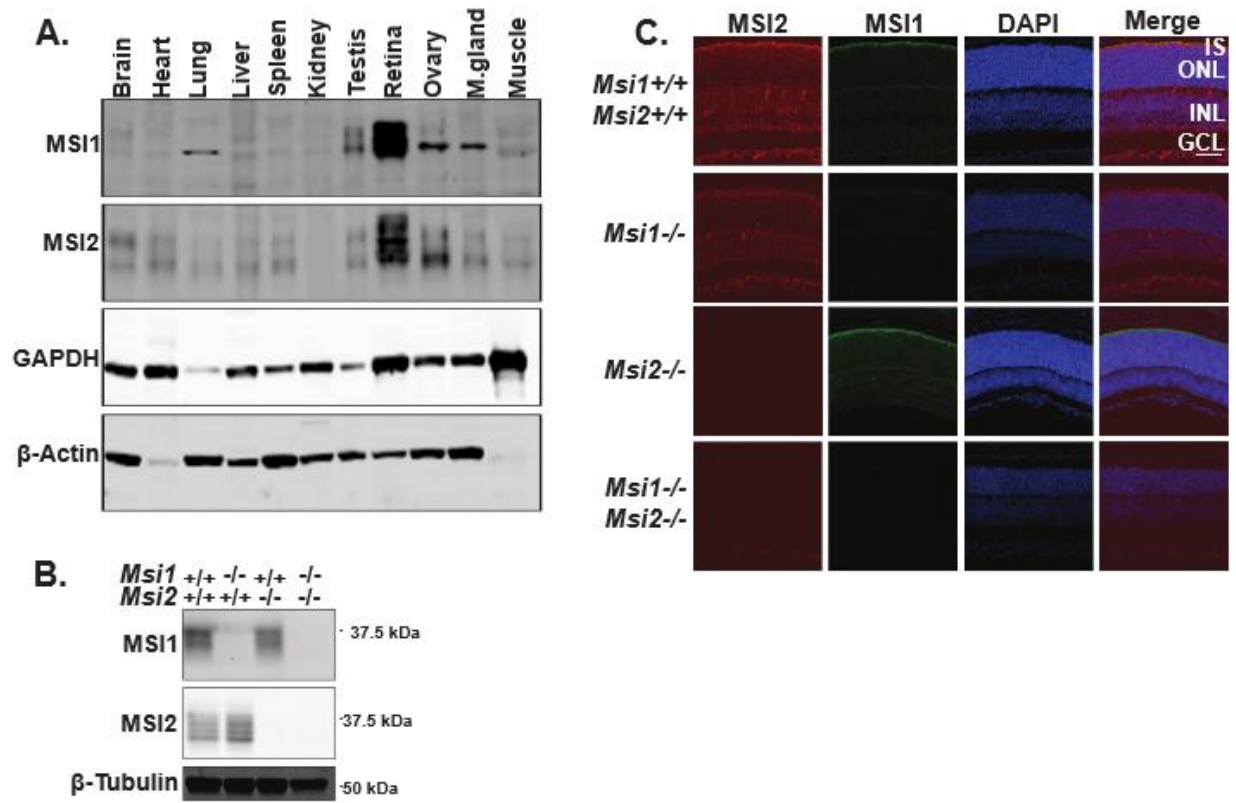

585

586

587

588 **FIGURE 2**

589

590

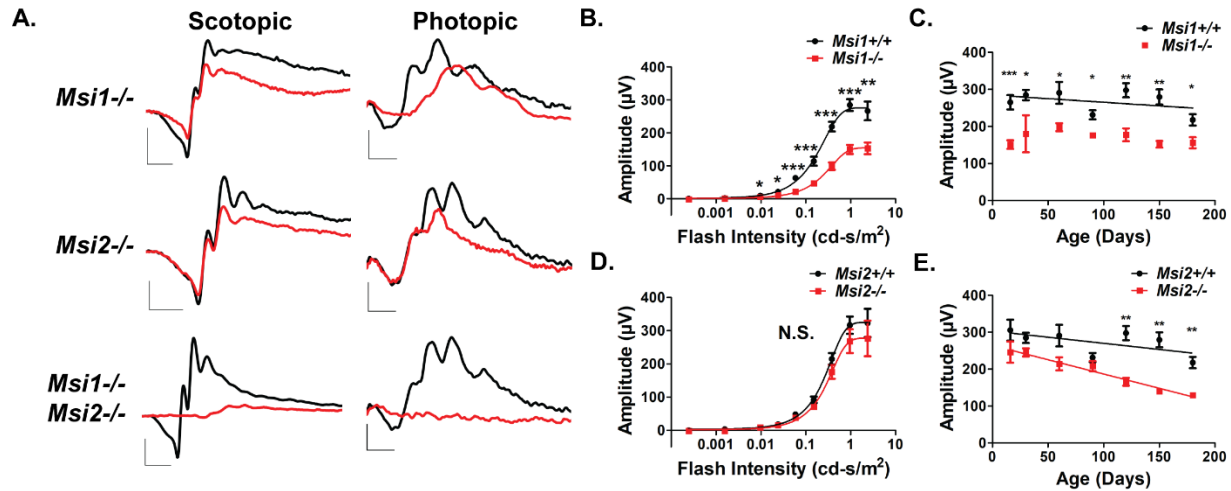

591

592

593

594 **FIGURE 3**

595

596

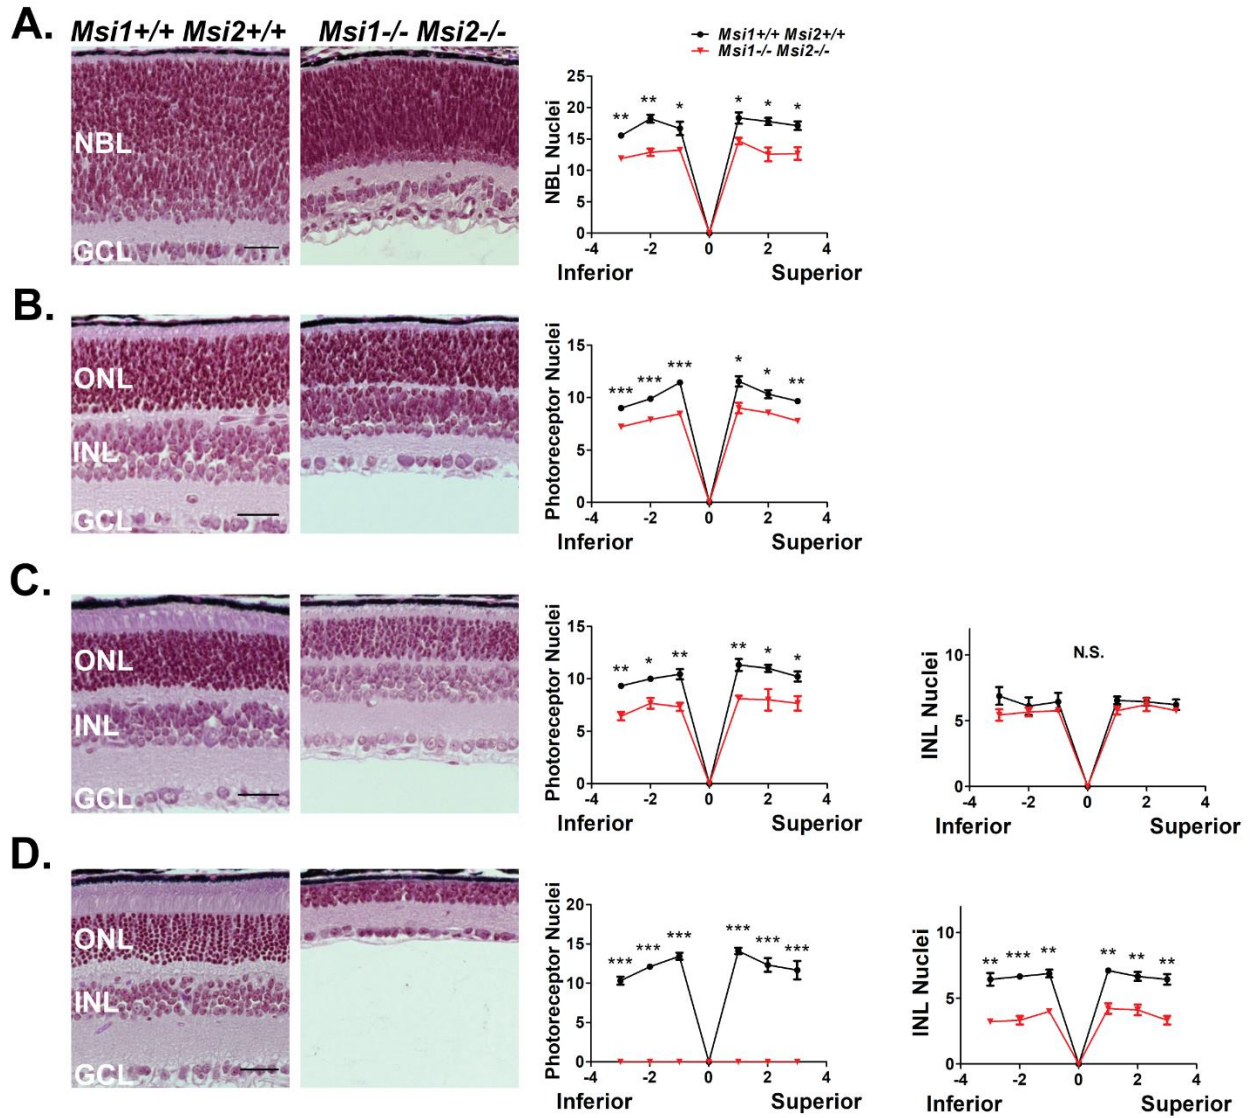

597

598

599

600 **FIGURE 4**

601

**A.**

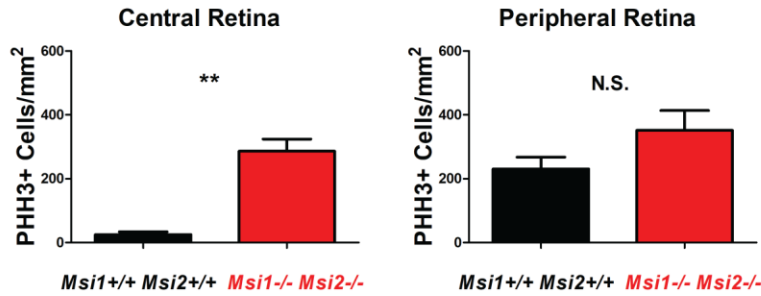

**B.**

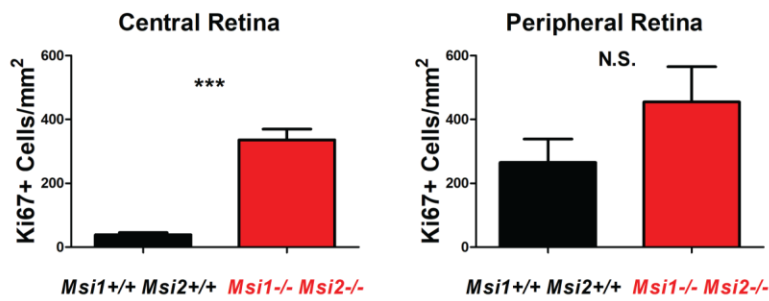

**C.**

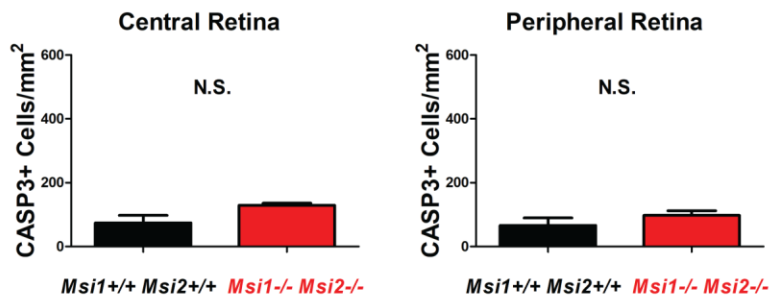

602

603

604



605 **FIGURE 5**

606

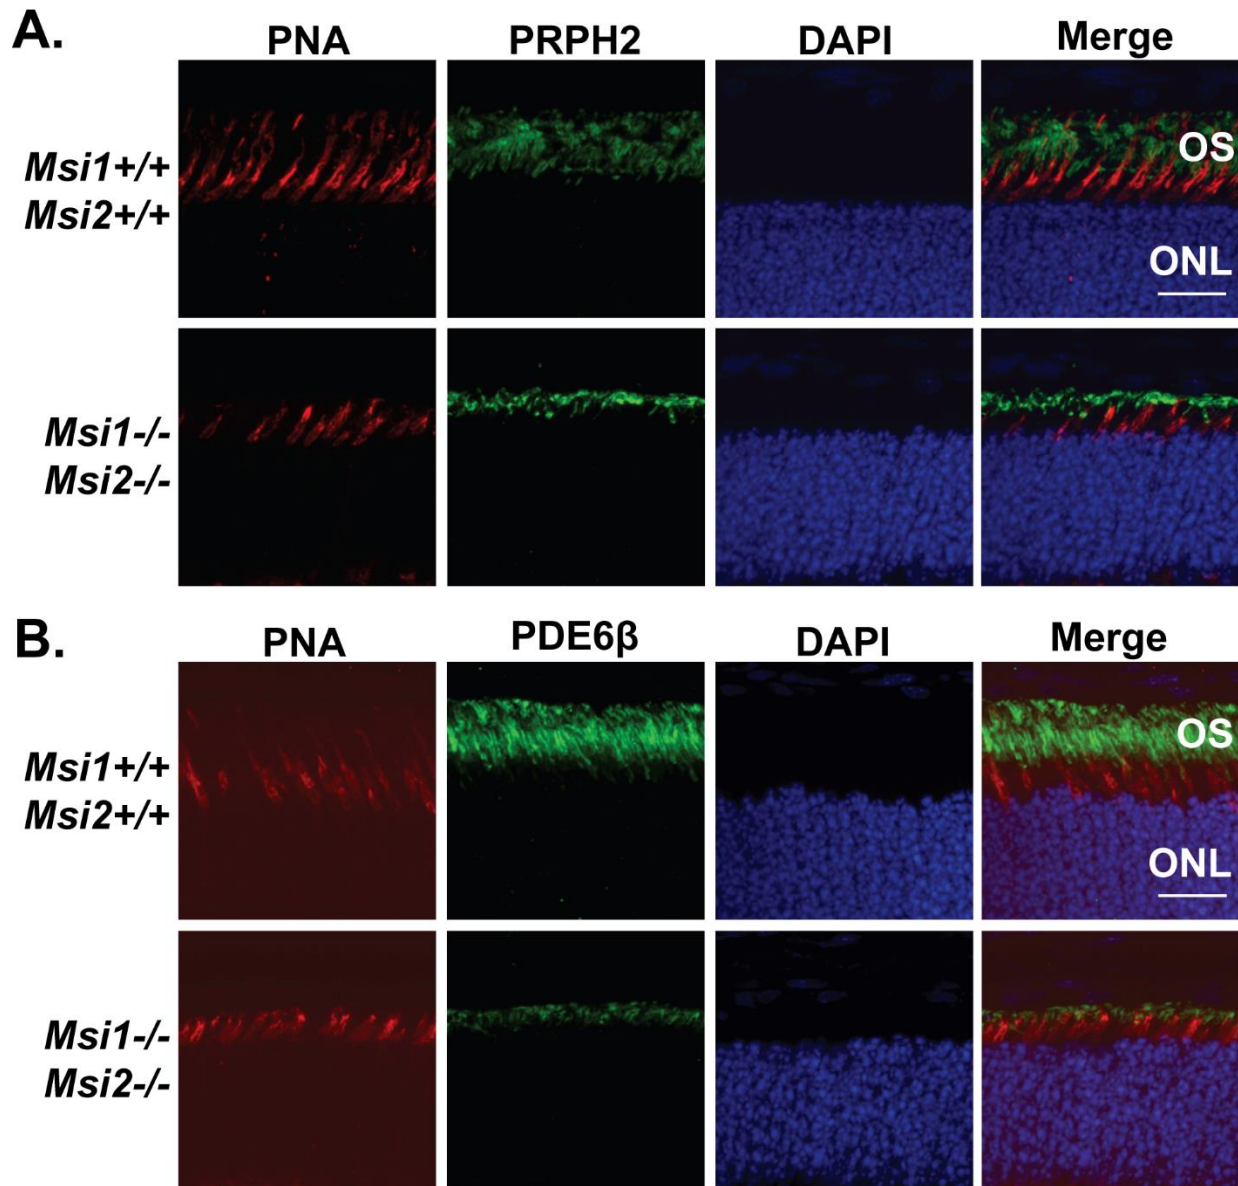

607

608

609

610 **FIGURE 6**

611

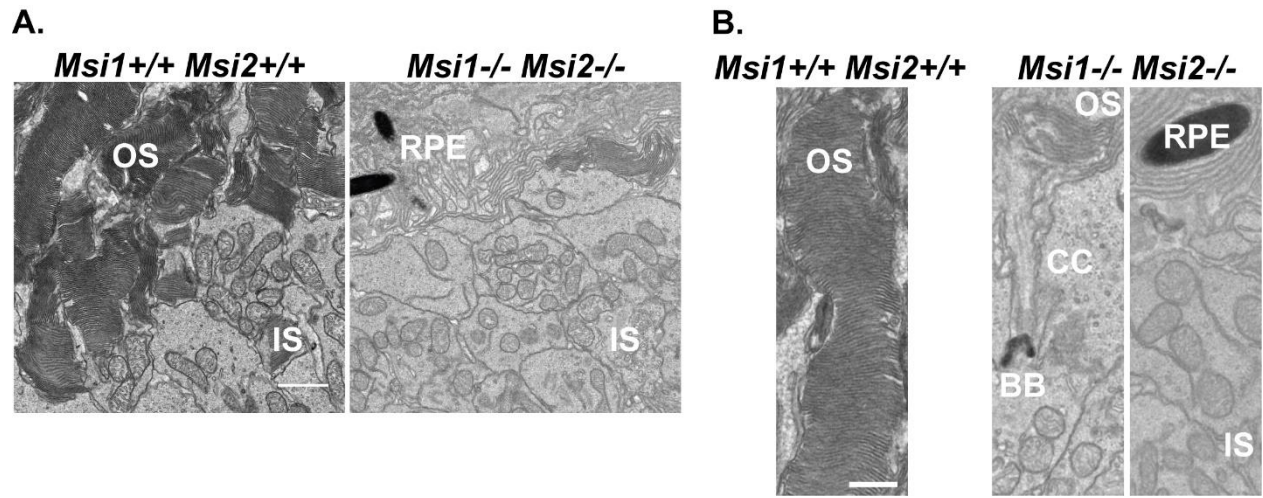

612

613

614

615 **FIGURE 7**

616

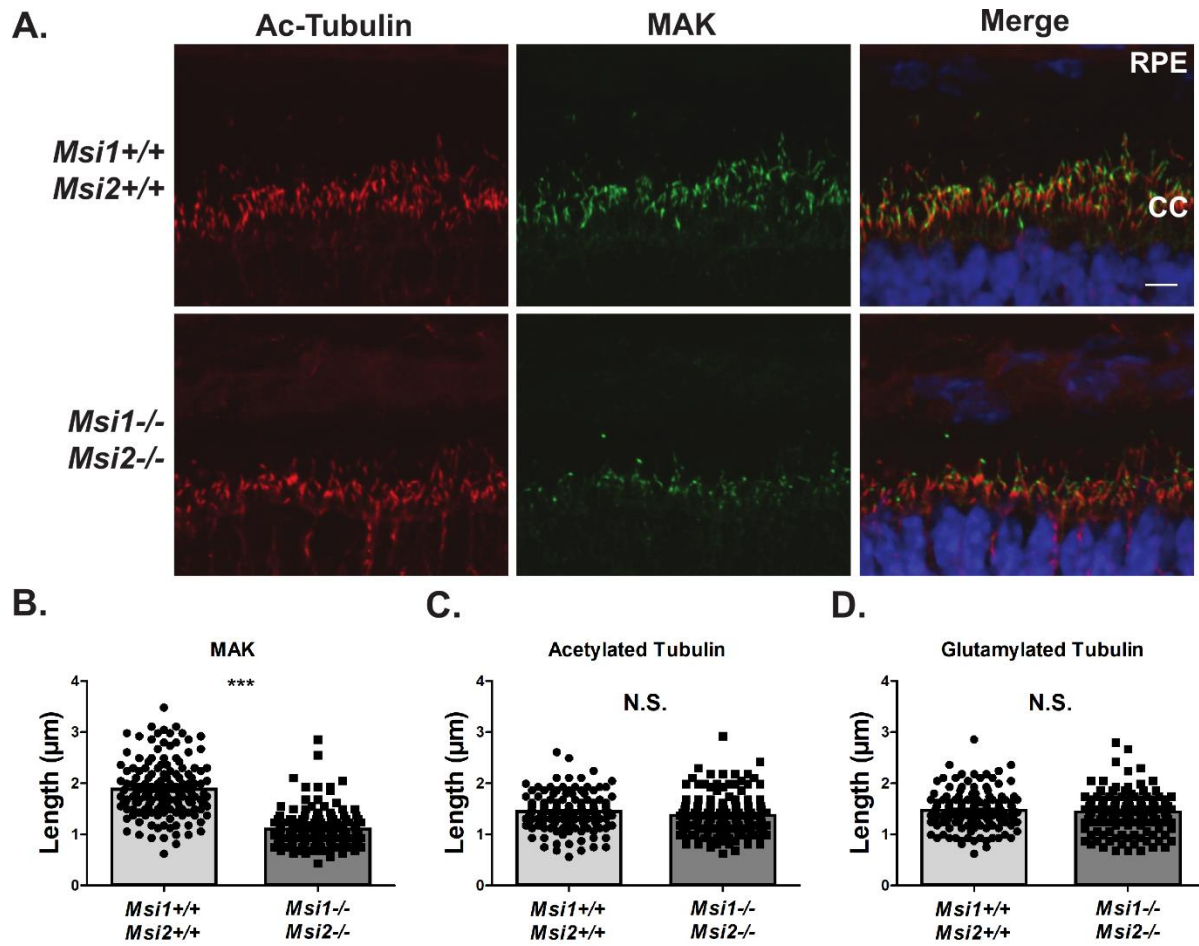

617

618

619

620 **FIGURE 8**

621

**A.**

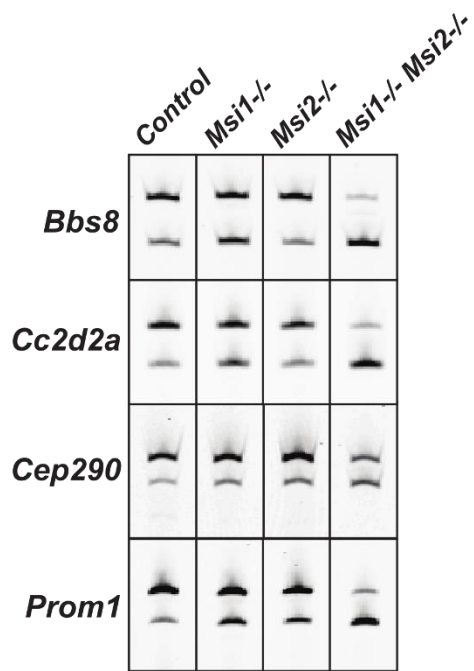

**B.**

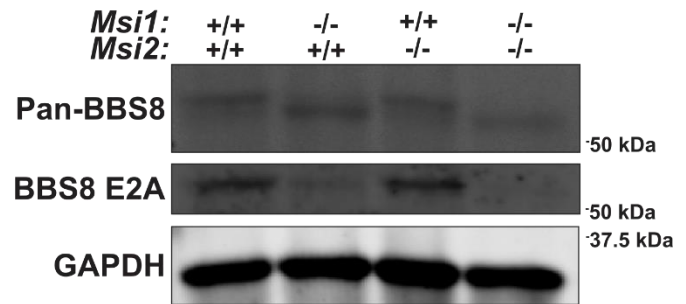

622

623

624

625 **FIGURE 9**

626

627

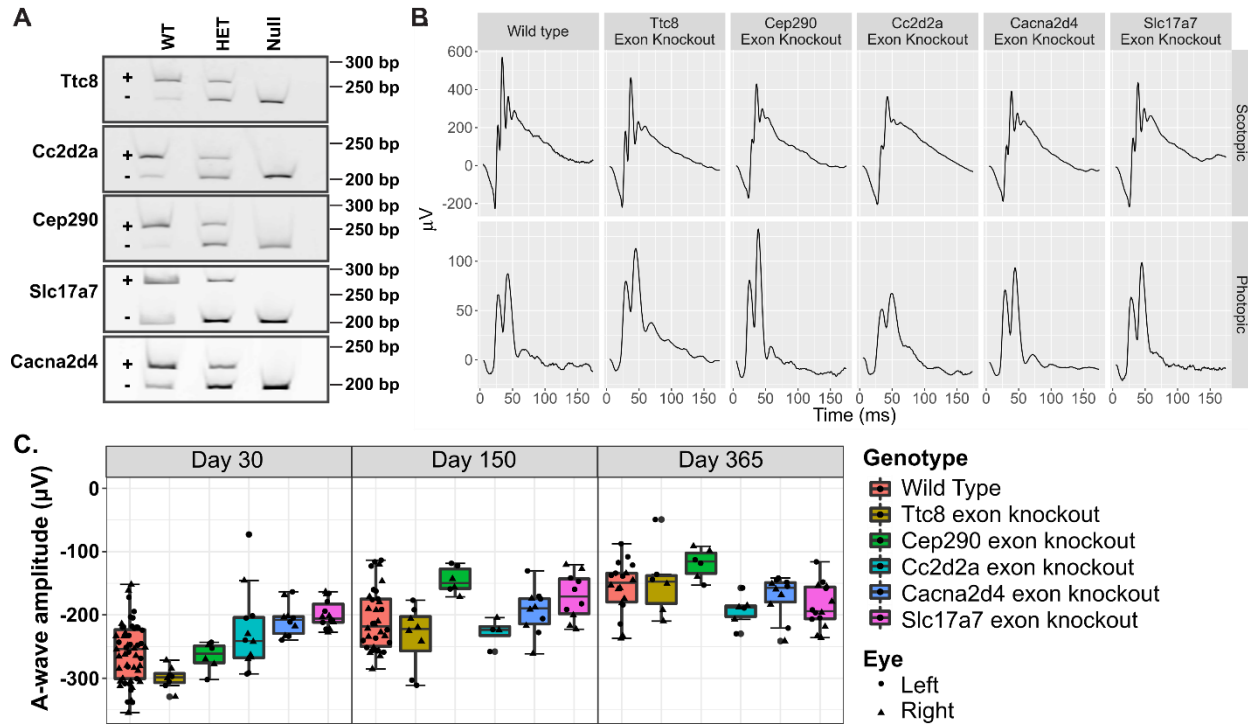

628

629

630 **FIGURE LEGENDS**

631

632 **Figure 1: Conditional Musashi knockout mouse models.**

633 **A.** Immunoblot of indicated tissues from adult wildtype mice probed with MSI1 and MSI2  
634 antibodies. GAPDH and  $\beta$ -Actin serve as a loading control.

635 **B.** Western blot analyses of Musashi in retinal lysates from *ret-Msi1*<sup>-/-</sup>, *ret-Msi2*<sup>-/-</sup>, and *ret-*  
636 *Msi1*<sup>-/-</sup>: *Msi2*<sup>-/-</sup> mice at PN10.  $\beta$ -tubulin levels provide a loading control.

637 **C.** Retinal sections from *ret-Msi1*<sup>-/-</sup>, *ret-Msi2*<sup>-/-</sup>, and *ret-Msi1*<sup>-/-</sup>: *Msi2*<sup>-/-</sup> mice at PN10 probed  
638 with MSI1 (Green) and MSI2 (Red) antibodies along with a DAPI nuclear counterstain (Blue).  
639 (IS: inner segment, ONL: outer nuclear layer, INL: inner nuclear layer, and GCL: ganglion cell  
640 layer). Scale bar = 50 $\mu$ m.

641

642 **Figure 2: The Musashi proteins are crucial for normal visual response.**

643 **A.** Representative scotopic and photopic electroretinograms (ERGs) from the *ret-Msi1*<sup>-/-</sup>, *ret-*  
644 *Msi2*<sup>-/-</sup>, and *ret-Msi1*<sup>-/-</sup>: *Msi2*<sup>-/-</sup> mice at PN16. Scotopic ERGs were obtained after overnight  
645 dark adaptation using 0.151 cd-s/m<sup>2</sup> flashes while photopic ERGs were obtained with 7.6 cd-  
646 s/m<sup>2</sup> flashes under light-adapted conditions using a rod-saturating white background light  
647 (Scotopic scale bar: x-axis = 20ms, y-axis = 200 $\mu$ V; Photopic scale bar: x-axis = 20ms, y-axis =  
648 20 $\mu$ V).

649 **B.** Intensity-response plot of the scotopic “a”-wave response from *ret-Msi1*<sup>-/-</sup> mice (\*=P-value <  
650 0.05; \*\*=P-value < 0.01; \*\*\*=P-value < 0.001).

651 **C.** Plot of the rod photoreceptor “a”-wave response from *ret-Msi1*<sup>-/-</sup> mice against the age of the  
652 mouse during which the ERG was recorded.

653 **D.** Intensity-response curve of the scotopic “a”-wave response from *ret-Msi2*<sup>-/-</sup> mice (\*=P-value  
654 < 0.05; \*\*=P-value < 0.01; \*\*\*=P-value < 0.001).

655 **E.** Plot of the rod photoreceptor “a”-wave response from *ret-Msi2*<sup>-/-</sup> mice plotted against the age  
656 of the mouse during which the ERG was recorded. All data is shown as the mean ± the SEM, and  
657 statistical analyses were carried out using the homoscedastic unpaired student’s t-test  
658 (\*=P<0.05).

659

### 660 **Figure 3: Retinal cell death occurs in the absence of the Musashi proteins**

661 Left: Brightfield microscopic images of H&E stained retinal cross sections from the *ret-Msi1*<sup>-/-</sup>:  
662 *Msi2*<sup>-/-</sup> mice at PN5 (A), PN10 (B), PN16 (C), and PN180 (D).

663 Right: Spider plot of the layer thickness at six regions from the inferior to superior retina in the  
664 *ret-Msi1*<sup>-/-</sup>: *Msi2*<sup>-/-</sup> mice at PN5 (NBL: neuroblast layer, ONL: outer nuclear layer, INL: inner  
665 nuclear layer, and GCL: ganglion cell layer)

666 All data is shown as the mean ± the SEM, and statistical analyses were carried out using the  
667 homoscedastic unpaired student’s t-test (\*=P-value < 0.05; \*\*=P-value < 0.01; \*\*\*=P-value <  
668 0.001).

669

### 670 **Figure 4: Increased proliferation of progenitors in the absence of MSI1 and MSI2**

671 Quantitation of PHH3<sup>+</sup> cells (A), Ki67<sup>+</sup> cells (B) and CASP3<sup>+</sup> cells (C) in the central (left) and  
672 peripheral (right) regions of the retina in PN5 *ret-Msi1*<sup>-/-</sup>: *Msi2*<sup>-/-</sup> mice and littermate control  
673 mice.

### 674 **Figure 5: The Musashi proteins are required for proper OS development**

675 **A.** Immunofluorescence microscopy images of retinal cross sections from the *ret-Msi1*<sup>-/-</sup>: *Msi2*<sup>-/-</sup>

676 *ret-Msi1*<sup>-/-</sup> mice at PN16 stained with anti-peripherin-2 antibody (PRPH2: OS marker - Green) and peanut  
677 agglutinin (PNA: cone OS marker - Red) along with a DAPI nuclear counterstain (Blue).

678 **B.** Immunofluorescence microscopy images of retinal cross sections from the *ret-Msi1*<sup>-/-</sup>; *Msi2*<sup>-/-</sup>  
679 *ret-Msi1*<sup>-/-</sup> mice at PN16 stained with anti-phosphodiesterase-6 $\beta$  antibody (PDE6 $\beta$ : rod OS marker -  
680 Green) and peanut agglutinin (PNA: cone OS marker - Red) along with a DAPI counterstain  
681 (Blue). (OS: outer segment and ONL: outer nuclear layer). Scale bar = 20 $\mu$ m.

682

### 683 **Figure 6: Abnormal development of OS in the absence of MSI1 and MSI2**

684 **A.** Low magnification transmission electron microscopy images of ultrathin retinal sections from  
685 *ret-Msi1*<sup>-/-</sup>; *Msi2*<sup>-/-</sup> mice at PN10 visualizing the boundary between the OS and IS showing the  
686 lack of typical outer segments in the absence of the Musashi proteins (OS: outer segment, IS:  
687 inner segment, and RPE: retinal pigment epithelium). Scale bar = 2 $\mu$ m.

688 **B.** High magnification transmission electron microscopy images of ultrathin retinal sections from  
689 *ret-Msi1*<sup>-/-</sup>; *Msi2*<sup>-/-</sup> mice at PN10 visualizing the boundary between the OS and IS showing that  
690 the OS either does not form (far right) or is dysmorphic (middle) in the absence of the Musashi  
691 proteins (OS: outer segment, CC: connecting cilium, BB: basal body, RPE: retinal pigment  
692 epithelium, and IS: inner segment). Scale bar = 1 $\mu$ m.

693

### 694 **Figure 7: The Musashi proteins are crucial for photoreceptor axoneme development**

695 **A.** Immunofluorescence microscopy images of retinal cross sections from the *ret-Msi1*<sup>-/-</sup>; *Msi2*<sup>-/-</sup>  
696 *ret-Msi1*<sup>-/-</sup> mice at PN10 stained with acetylated- $\alpha$ -tubulin antibody (Ac-Tubulin: Red) and male germ  
697 cell-associated kinase antibody (MAK: Green) along with DAPI counterstain (Blue) (RPE:  
698 retinal pigment epithelium, CC: connecting cilium, and ONL: outer nuclear layer).



699 Scatter bar plot showing the distribution of length measurements for the photoreceptor axoneme  
700 by MAK staining (**B**) and connecting cilium by Ac-tubulin staining (**C**) and glutamylated tubulin  
701 staining (**D**). Retinal sections were obtained from PN10 musashi knockouts and littermate  
702 controls.

703

### 704 **Figure 8: The Musashi proteins regulate alternative splicing of their target transcripts**

705 **A.** Reverse transcriptase PCR splicing assay using total RNA purified from retinal lysates of *ret-*  
706 *Msi1*<sup>-/-</sup>, *ret-Msi2*<sup>-/-</sup>, and *ret-Msi1*<sup>-/-</sup>: *Msi2*<sup>-/-</sup> mice. *Ttc8*, *Cc2d2a*, *Cep290*, and *Prom1* are four  
707 cilia- and OS-related transcripts shown to have reduced photoreceptor-specific exon inclusion in  
708 the absence of MSI1 and MSI2.

709 **B.** Immunoblot of retinal lysates from *ret-Msi1*<sup>-/-</sup>, *ret-Msi2*<sup>-/-</sup>, and *ret-Msi1*<sup>-/-</sup>: *Msi2*<sup>-/-</sup> mice.

710 After probing with the pan-Ttc8 antibody (top), a change in the migration of the Ttc8 protein is  
711 observed in the absence of MSI1 and MSI2 suggesting that the peptide encoded by Exon 2A was  
712 not included. When probing with the Ttc8 E2A antibody (middle), photoreceptor-specific  
713 isoform of Ttc8 was not observed in the absence of MSI1 and MSI2.

### 714 **Figure 9: Exon knockout mice have normal photoreceptor function**

715 **A.** Analysis of alternative splicing of the *Ttc8*, *Cc2d2a*, *Cep290*, *Slc17a7*, and *Cacna2d4* genes  
716 in wild type (WT), heterozygous (Het) and homozygous (Null) exon knockouts by RT-PCR.  
717 Isoforms including and skipping the alternative exon are indicated by “+” and “-”, respectively.

718 **B.** Representative scotopic and photopic electroretinograms (ERGs) from wildtype, *Ttc8* exon  
719 knockout, *Cep290* exon knockout, *Cc2d2a* exon knockout, *Cacna2d4* exon knockout, and  
720 *Slc17a7* exon knockout mouse models at postnatal day 150. Scotopic ERGs were obtained after  
721 dark adaptation while photopic ERGs were obtained under light-adapted conditions using a rod-

722 saturating white background light. No changes in photoreceptor function are observed compared  
723 to control.

724 **C.** Box blot of a-wave intensities normalized to the median of the wild type a-wave at postnatal  
725 days 30, 150 and 356. No significant changes in photoreceptor function of the knockouts of  
726 photoreceptor specific exons in the *Ttc8*, *Cep290*, *Cc2d2a*, *Cacna2d4* and *Slc17a7* genes are  
727 observed compared to the wild type control.

728

729
